# Supplementary material for: Characterization of Calpain and Caspase-6 Generated Glial Fibrillary Acidic Protein Breakdown Products Following Traumatic Brain Injury and Astroglial Cell Injury
Source: Preprints.org preprint supplement (doi:10.20944/preprints202206.0310.v1), 2022-06-22
Supplement: Supplementary file 3 [file supplementary]

**IJMS Ms Suppl. Materials Yang et al.**

**Supplementary Figure S1. Effects of caspase-6 and calpain inhibitor on GBDP-38K production in rat cerebrocortical culture after STS treatment.** Data shown is representative of N=3. STS; staurosporine (1 µM for 24 h) in the presence or absence of calpain inhibitor MDL-28170 (50 µM), caspase-6 inhibitor Z-IVED-FMK (50 µM) or pan-caspase inhibitor Z-D-DCB. STS generated GBDP38K was not blocked by Z-IVED-FMK or Z-d-DCB, but by MDL28170.

**Supplementary Figure S2. GFAP proteolysis in rat primary glial culture after cytotoxin-challenges as well as LPS (200 ng/mL) stimulation for 24 h.** Data shown is representative of N=3. A232: A23187, STS; staurosporine, SNJ; calpain inhibitor SNJ1945, Z_D- pan caspase inhibitor Z-D-DCB

**Supplementary Figure S3. GFAP is relatively resistant to caspase-3 digestion. (A) GFAP from cortical mixed culture lysate is relatively resistant to in vitro digestion by caspase-3 generating 0nly minor appearance of 44K and 20K fragments. (B) Purified recombinant GFAP is also resistant to caspase-3 digestion.**

**Supplementary Figure S4. Full length human GFAP digestion by calpain generated several C-terminal LMW peptides. GBDP-specific antibody detected GFAP-fragments of 40k, 38K were specifically sensitive to calpain inhibitor SNJ-1945, but not sensitive to pan caspase inhibitor Z-D-DCB. (A) anti-GFAP-Core Ab, (B) GBDP-N-term PAb.**

**Supplementary Figure S5. GFAP protein and GBDP are neurotoxic to rat cerebrocortical culture.** Cultured cells were treated with 500ng GFAP fragment (calpain or caspase-6 digestion) *compared with control P<0.05, ** compared with control P<0.01; #compared with intact GFAP treatment, P<0.05.

**Suppl. Figure S6.** Unbiased LC/MS/MS followed by **A and B)** *de novo* sequencing or **C and D)** database searching both revealed GFAP peptides from pooled human acute TBI CSF samples from n=10 samples (6-12 hr post-injury): **A and C)** DGEVIKES and **B and D)** DGEVIKE as shown by the annotated spectra. Note: I/L are isobaric, based on the amino acid sequence for human GFAP DGEVLKES and DGEVLKE (*de novo* sequencing) 🡪 DGEVIKES and DGEVIKE (database searching).

**Supplementary TABLE S1. Severe TBI patient demographic data.**

**
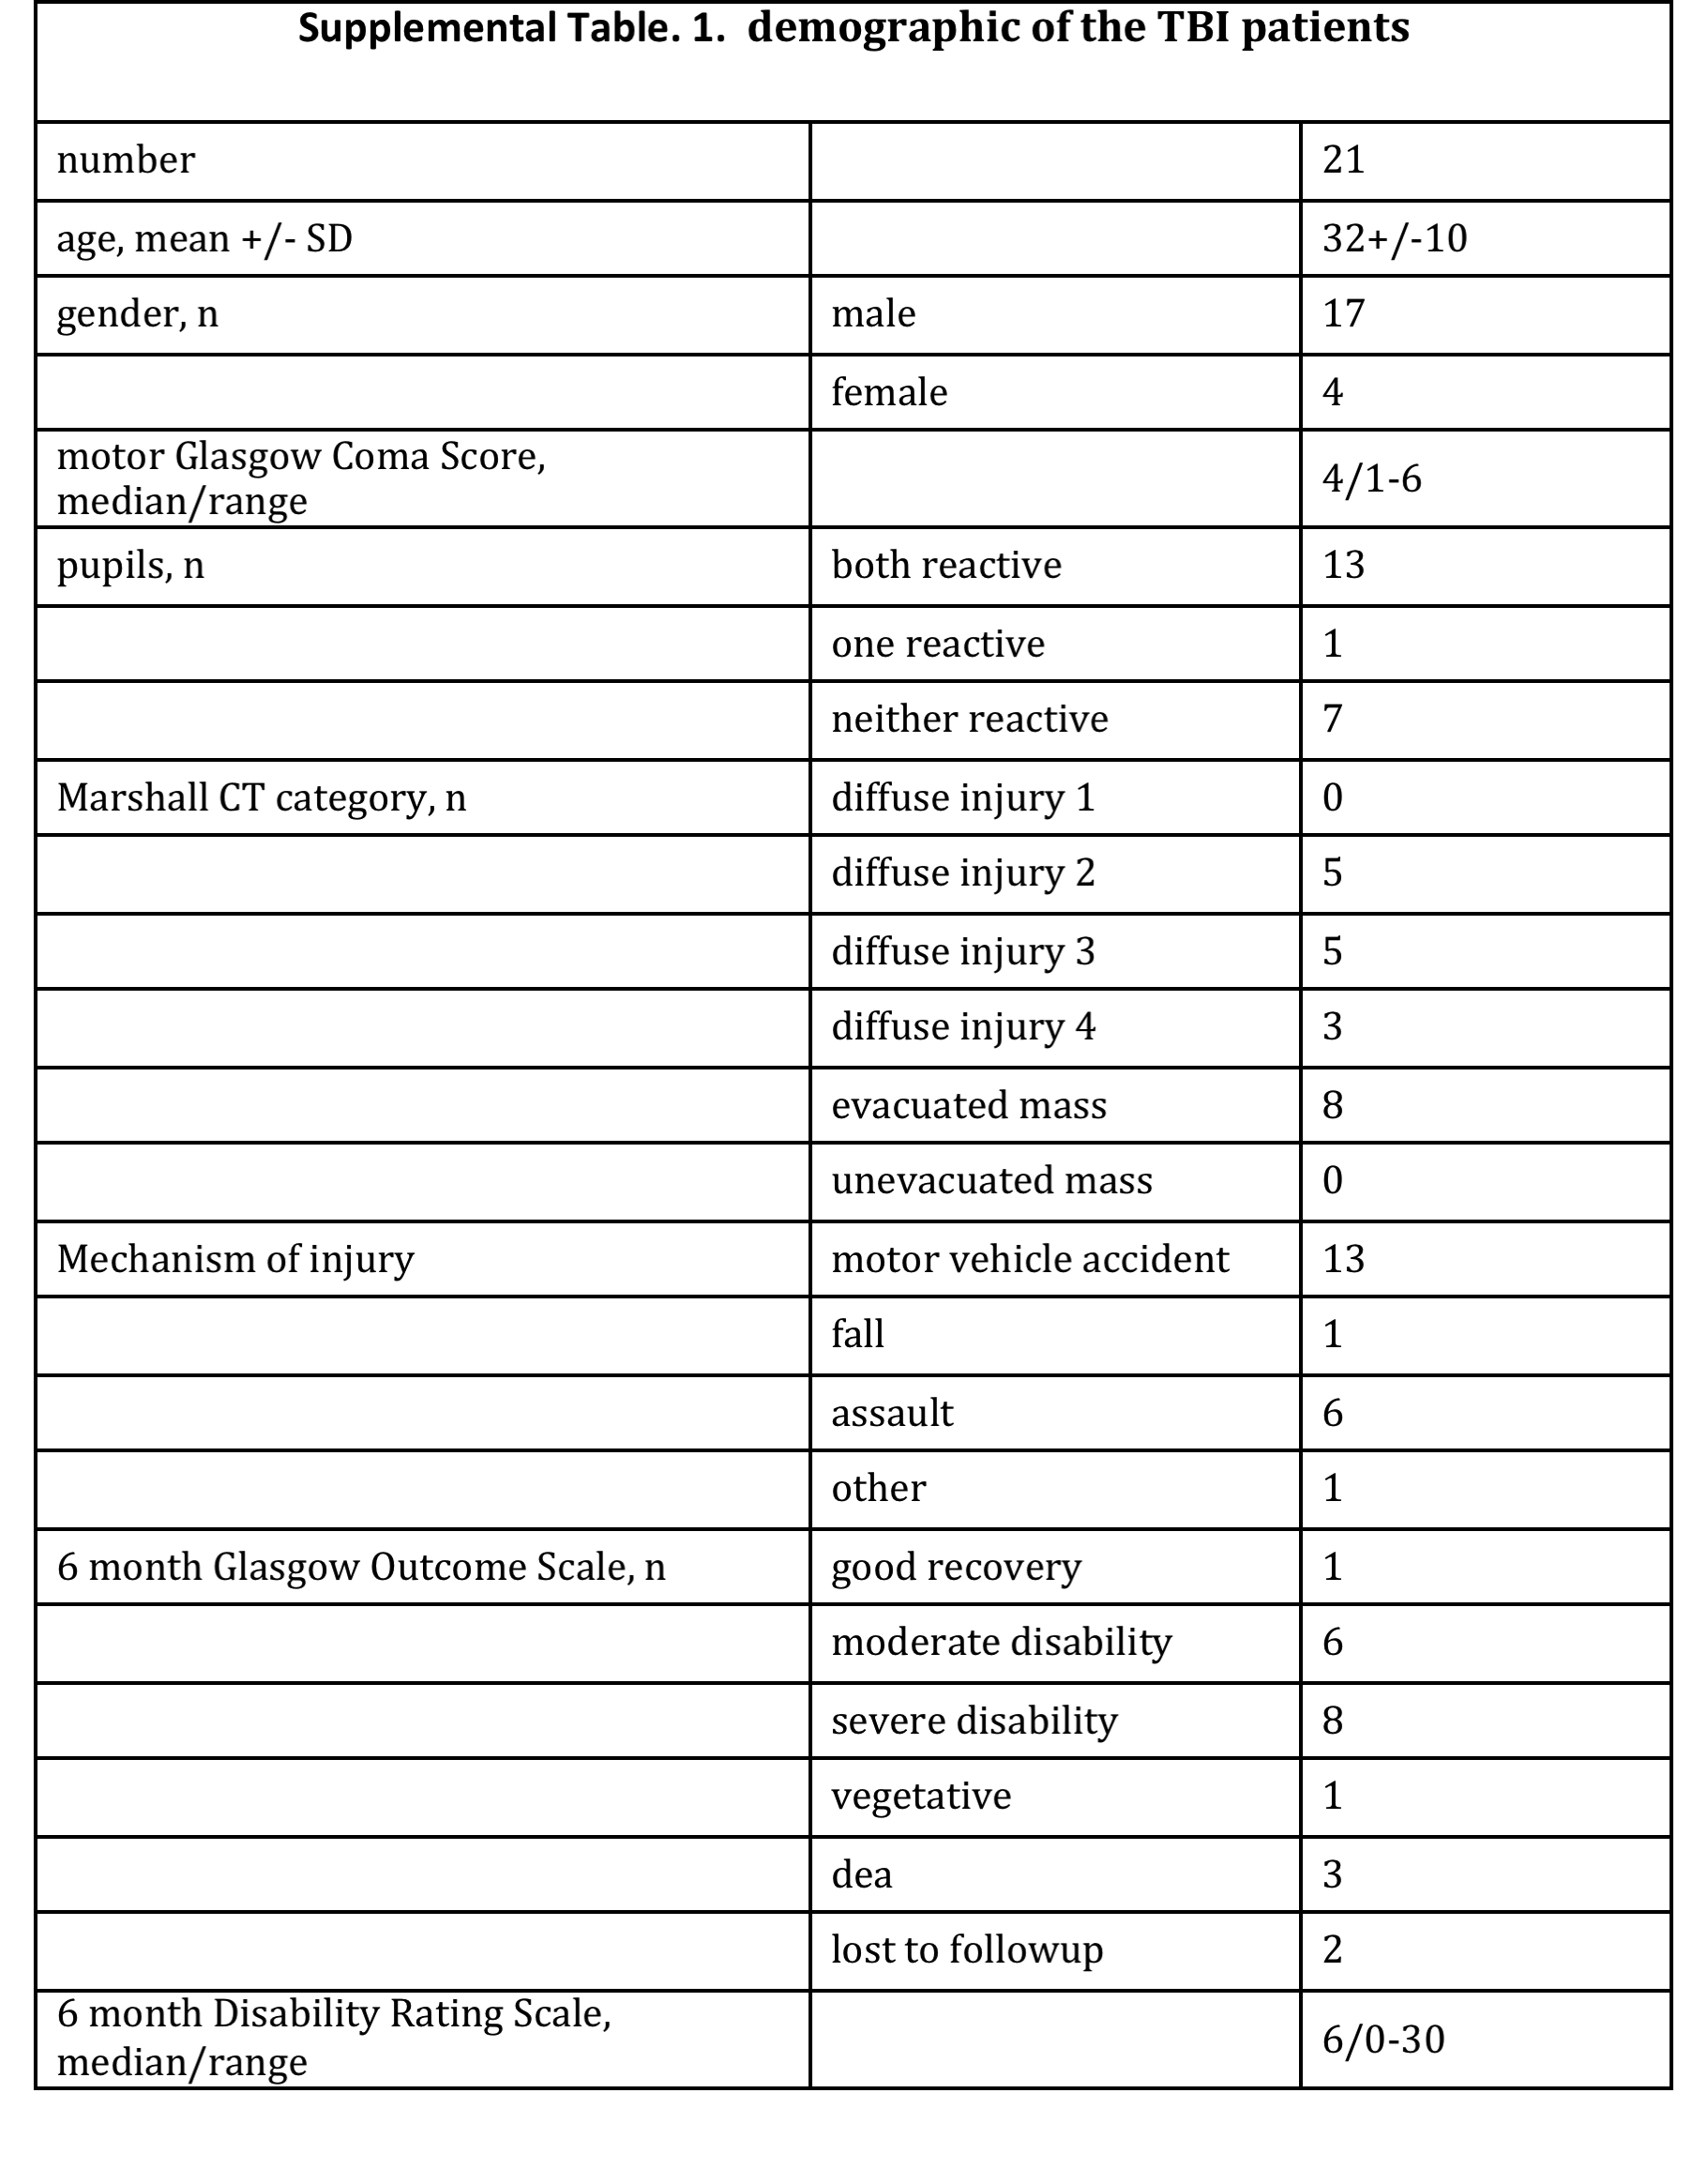
**

**Suppl. Table 2 GFAP peptides LC-selected reaction monitoring (SRM)- MS/MS parameters**
